# Supplementary material for: Differences in the Concentration of Anti-SARS-CoV-2 IgG Antibodies Post-COVID-19 Recovery or Post-Vaccination
Source: MDPI journal article supplement (doi:10.3390/cells10081952), 2021-07-31
Supplement: s1 [file s1]

*Table S1. Detailed characteristics of the sex and age of the study participants, taking into account the division into subgroups*

| SARS-CoV-2 and vaccination status                     | N   | Female               |       |       |       |     | Male |       |       |       |     |
|-------------------------------------------------------|-----|----------------------|-------|-------|-------|-----|------|-------|-------|-------|-----|
|                                                       |     | Age category (years) |       |       |       |     |      |       |       |       |     |
|                                                       |     | <=35                 | 36-45 | 46-55 | 56-65 | 65+ | <=35 | 36-45 | 46-55 | 56-65 | 65+ |
| uninfected, unvaccinated                              | 24  | 4                    | 2     | 3     | 5     | 0   | 2    | 4     | 2     | 1     | 1   |
| asymptomatic SARS-recovered, unvaccinated             | 15  | 2                    | 0     | 2     | 1     | 1   | 2    | 1     | 4     | 2     | 0   |
| symptomatic SARS-recovered, unvaccinated              | 82  | 11                   | 14    | 12    | 15    | 6   | 2    | 6     | 4     | 5     | 7   |
| 2 weeks after the first vaccine dose, uninfected      | 8   | 2                    | 1     | 1     | 0     | 1   | 0    | 1     | 0     | 1     | 1   |
| 3 week safter the first vaccine dose,uninfected       | 11  | 4                    | 1     | 0     | 2     | 1   | 0    | 1     | 0     | 1     | 1   |
| 3 weeks after the first vaccine dose, SARS-recovered  | 9   | 1                    | 1     | 3     | 3     | 0   | 0    | 0     | 0     | 0     | 1   |
| 1 week after the second vaccine dose, uninfected      | 17  | 4                    | 1     | 4     | 2     | 2   | 1    | 2     | 0     | 1     | 0   |
| 1 week after the second vaccine dose, SARS-recovered  | 10  | 1                    | 2     | 2     | 3     | 0   | 0    | 0     | 0     | 0     | 2   |
| 2 weeks after the second vaccine dose, uninfected     | 39  | 7                    | 3     | 6     | 7     | 7   | 1    | 1     | 1     | 3     | 3   |
| 2 weeks after the second vaccine dose, SARS-recovered | 22  | 3                    | 4     | 4     | 3     | 4   | 1    | 0     | 0     | 0     | 3   |
| 3 weeks after the second vaccine dose, uninfected     | 24  | 5                    | 4     | 4     | 1     | 2   | 1    | 2     | 2     | 2     | 1   |
| 3 weeks after the second vaccine dose, SARS-recovered | 36  | 3                    | 14    | 7     | 7     | 1   | 2    | 1     | 1     | 0     | 0   |
| 4 weeks after the second vaccine dose, uninfected     | 55  | 7                    | 12    | 16    | 9     | 2   | 1    | 3     | 1     | 2     | 2   |
| 4 weeks after the second vaccine dose, SARS-recovered | 31  | 6                    | 10    | 3     | 5     | 1   | 2    | 3     | 1     | 0     | 0   |
| 5 weeks after the second vaccine dose, uninfected     | 68  | 9                    | 18    | 10    | 17    | 0   | 1    | 4     | 5     | 3     | 1   |
| 5 weeks after the second vaccine dose, SARS-recovered | 26  | 1                    | 5     | 7     | 6     | 2   | 1    | 0     | 1     | 3     | 0   |
| Total                                                 | 477 | 70                   | 92    | 84    | 86    | 30  | 17   | 29    | 22    | 24    | 23  |

Figure S1. Analysis of the mean concentrations of G class antibodies against the S1 subunit of SARS-CoV-2 in the SARS-recovered and vaccinated subgroups

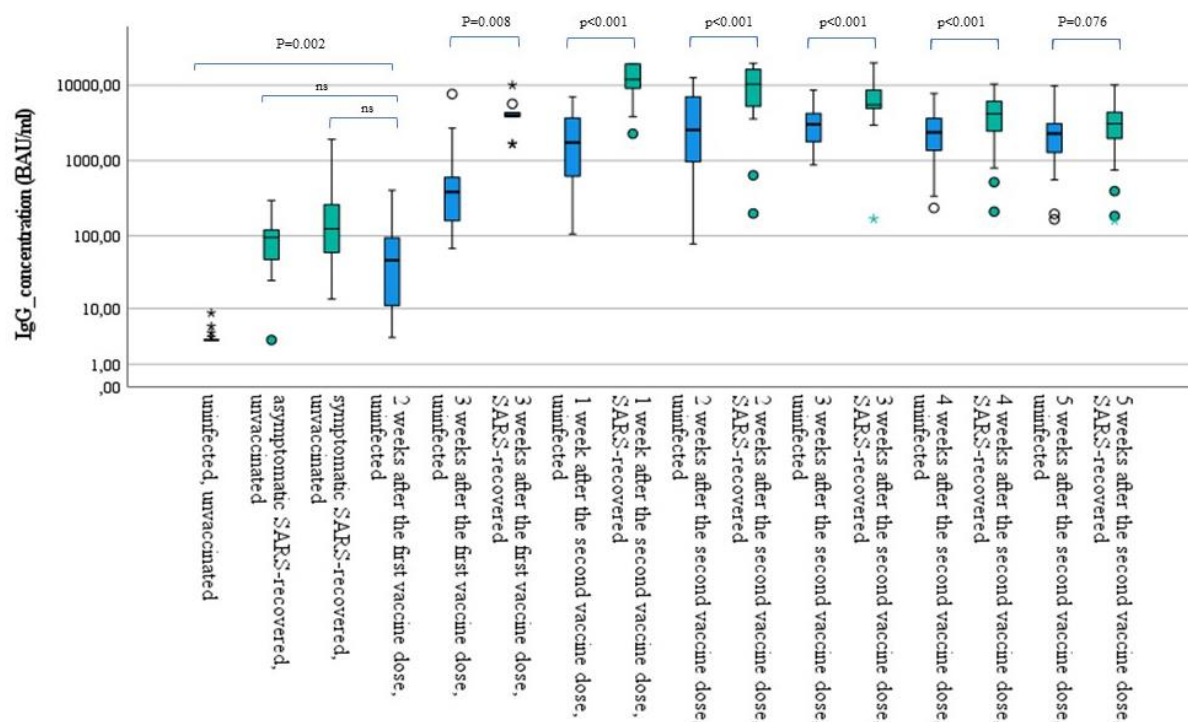

**Comparisons of antibody levels between the analysed patients subgroups.** Blue colour indicates the concentration of anti-SARS-CoV-2 IgG antibodies in seronegative individuals before vaccination. Individuals with confirmed SARS-CoV-2 infection prior to receiving the mRNA vaccine dose, as well as seropositive unvaccinated individuals, are marked in green.

#### Tests of Homogeneity of Variances

|                            |                                      | Levene Statistic | df1 | df2     | Sig. |
|----------------------------|--------------------------------------|------------------|-----|---------|------|
| IgG_concentration (BAU/ml) | Based on Mean                        | 22,709           | 15  | 461     | ,000 |
|                            | Based on Median                      | 15,241           | 15  | 461     | ,000 |
|                            | Based on Median and with adjusted df | 15,241           | 15  | 164,019 | ,000 |
|                            | Based on trimmed mean                | 21,057           | 15  | 461     | ,000 |

#### ANOVA

IgG\_concentration (BAU/ml)

|                | Sum of Squares | df  | Mean Square   | F      | Sig. |
|----------------|----------------|-----|---------------|--------|------|
| Between Groups | 3908014005,181 | 15  | 260534267,012 | 35,305 | ,000 |
| Within Groups  | 3402009785,832 | 461 | 7379630,772   |        |      |
| Total          | 7310023791,012 | 476 |               |        |      |

Figure S2. Means Plots for convalescent and vaccinated subgroups.

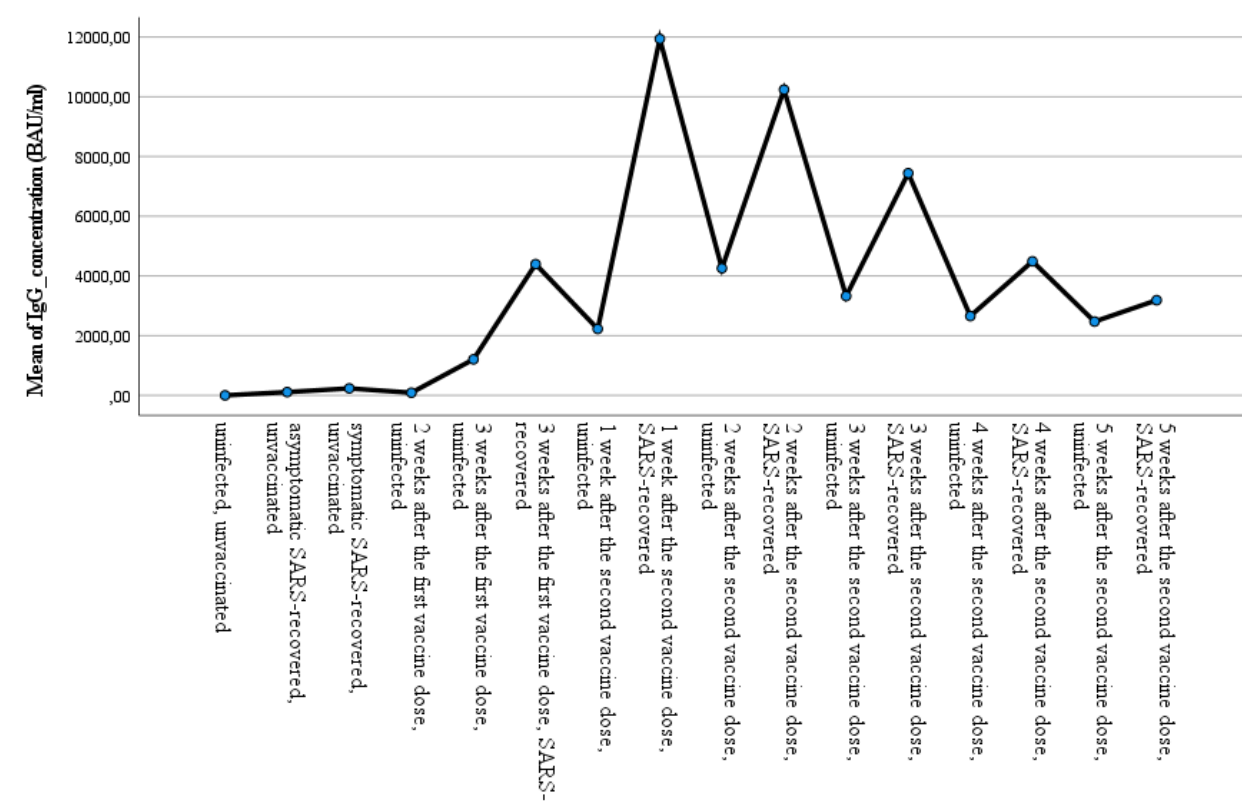

*Table S2. One-way ANOVA for comparisons between subgroups*

|                | Sum of Squares | df | Mean Square | F      | Sig.  |
|----------------|----------------|----|-------------|--------|-------|
| Between Groups | 46242,329      | 1  | 46242,329   | 11,214 | 0,002 |
| Within Groups  | 123707,811     | 30 | 4123,594    |        |       |
| Total          | 169950,140     | 31 |             |        |       |

|                | Sum of Squares | df | Mean Square | F     | Sig.  |
|----------------|----------------|----|-------------|-------|-------|
| Between Groups | 2351,804       | 1  | 2351,804    | 0,208 | 0,653 |
| Within Groups  | 237991,400     | 21 | 11332,924   |       |       |
| Total          | 240343,204     | 22 |             |       |       |

|                | Sum of Squares | df | Mean Square   | F      | Sig.  |
|----------------|----------------|----|---------------|--------|-------|
| Between Groups | 503047953,900  | 1  | 503047953,900 | 22,496 | 0,000 |
| Within Groups  | 1319339964,442 | 59 | 22361694,313  |        |       |
| Total          | 1822387918,342 | 60 |               |        |       |

|                | Sum of Squares | df | Mean Square   | F      | Sig.  |
|----------------|----------------|----|---------------|--------|-------|
| Between Groups | 593860671,424  | 1  | 593860671,424 | 37,843 | 0,000 |
| Within Groups  | 392319196,395  | 25 | 15692767,856  |        |       |
| Total          | 986179867,819  | 26 |               |        |       |

|                | Sum of Squares | df | Mean Square   | F     | Sig.  |
|----------------|----------------|----|---------------|-------|-------|
| Between Groups | 255855376,104  | 2  | 127927688,052 | 8,277 | 0,001 |
| Within Groups  | 911932802,458  | 59 | 15456488,177  |       |       |
| Total          | 1167788178,562 | 61 |               |       |       |

|                | Sum of Squares | df | Mean Square  | F      | Sig.  |
|----------------|----------------|----|--------------|--------|-------|
| Between Groups | 67422256,608   | 1  | 67422256,608 | 14,115 | 0,000 |
| Within Groups  | 391675211,452  | 82 | 4776526,969  |        |       |
| Total          | 459097468,060  | 83 |              |        |       |

|                | Sum of Squares | df | Mean Square | F     | Sig.  |
|----------------|----------------|----|-------------|-------|-------|
| Between Groups | 9643545,062    | 1  | 9643545,062 | 3,213 | 0,076 |
| Within Groups  | 276125620,968  | 92 | 3001365,445 |       |       |
| Total          | 285769166,030  | 93 |             |       |       |

Table S3. Mean anti-SARS-CoV-2 IgG concentrations by gender and age of the study participants.

|                                                       | Female  |          |          |          |          | Male    |         |         |         |          |
|-------------------------------------------------------|---------|----------|----------|----------|----------|---------|---------|---------|---------|----------|
|                                                       | <= 35   | 36 – 45  | 46 - 55  | 56 – 64  | 65+      | <= 35   | 36 - 45 | 46 - 55 | 56 - 64 | 65+      |
| uninfected, unvaccinated                              | 3.20    | 3.20     | 5.32     | 3.27     | .        | 4.29    | 3.20    | 3.20    | 3.20    | 3.20     |
| asymptomatic SARS-recovered, unvaccinated             | 57.43   | .        | 59.53    | 94.95    | 104.32   | 45.41   | 115.10  | 233.41  | 58.09   | .        |
| symptomatic SARS-recovered, unvaccinated              | 113.49  | 121.95   | 287.37   | 437.77   | 200.30   | 101.42  | 136.60  | 88.26   | 155.35  | 438.51   |
| 2 weeks after the first vaccine dose, uninfected      | 58.83   | 131.04   | 43.79    | .        | 3.55     | .       | 4.32    | .       | 26.08   | 404.45   |
| 3 weeks after the first vaccine dose, uninfected      | 375.49  | 945.10   | .        | 5192.90  | 83.82    | .       | 67.62   | .       | 148.40  | 170.72   |
| 3 weeks after the first vaccine dose, SARS-recovered  | 5685.00 | 1666.00  | 3335.67  | 6125.00  | .        | .       | .       | .       | .       | 3840.00  |
| 1 week after the second vaccine dose, uninfected      | 2117.15 | 1747.20  | 1251.96  | 3652.10  | 2316.65  | 4449.00 | 2112.00 | .       | 2050.90 | .        |
| 1 week after the second vaccine dose, SARS-recovered  | 9164.00 | 14182.00 | 10740.15 | 14382.17 | .        | .       | .       | .       | .       | 8624.25  |
| 2 weeks after the second vaccine dose, uninfected     | 7460.89 | 8190.83  | 6441.80  | 2970.64  | 2285.33  | 2010.00 | 248.00  | 2354.00 | 1528.90 | 1580.67  |
| 2 weeks after the second vaccine dose, SARS-recovered | 8126.67 | 9335.13  | 12698.25 | 10439.00 | 10290.17 | 3840.00 | .       | .       | .       | 12160.00 |
| 3 weeks after the second vaccine dose, uninfected     | 4799.08 | 4772.90  | 2818.60  | 2929.80  | 1367.50  | 2015.50 | 3836.80 | 2521.35 | 1368.10 | 2369.00  |
| 3 weeks after the second vaccine dose, SARS-recovered | 4203.33 | 10009.61 | 5087.21  | 7463.86  | 5376.00  | 4022.90 | 8649.50 | 5255.50 | .       | .        |
| 4 weeks after the second vaccine dose, uninfected     | 3223.93 | 3209.92  | 2484.94  | 1779.22  | 2260.75  | 2506.00 | 4119.67 | 1056.50 | 3264.50 | 1193.50  |
| 4 weeks after the second vaccine dose, SARS-recovered | 5575.08 | 5218.65  | 3249.83  | 2165.00  | 7926.50  | 5406.25 | 3062.67 | 5076.50 | .       | .        |
| 5 weeks after the second vaccine dose, uninfected     | 2549.78 | 2515.36  | 2332.80  | 2448.29  | .        | 1094.50 | 2451.63 | 3254.10 | 2275.00 | 1093.50  |
| 5 weeks after the second vaccine dose, SARS-recovered | 3333.50 | 2255.25  | 2968.57  | 3915.75  | 2338.25  | 4809.50 | .       | 3301.50 | 3760.50 | .        |
